# Supplementary material
Source: publisher figshare collection journal article supplement (https://karger.figshare.com/ndownloader/files/22244145)
Supplement: Supplementary file 1 [file 22244145]

|  | Standardized differences | | Variance ratio |
| --- | --- | --- | --- |
|  | Raw | Weighted | Raw Weighted |
|  |  |  |  |
| Steroids protocol |  |  |  |
| yes | -.159 | .109 | 1.442 0.818 |
|  |  |  |  |
| Delayed graft function |  |  |  |
| yes | -.0407 | .0132 | .904 1.034 |
|  |  |  |  |
| Recipient gender |  |  |  |
| Female | -.002 | -0.007 | .996 0.994 |
|  |  |  |  |
| Donor type |  |  |  |
| Living - unrelated | 0.338 | -.007 | 2.655 0.983 |
| DBD | -0.373 | -.006 | 1.184 1.001 |
|  |  |  |  |
| ethnicity |  |  |  |
| Asian | 0.1646 | -.0745 | 1.504 0.858 |
| Black | 0.129 | -.0623 | 1.724 0.805 |
| Other | 0.0238 | -.0562 | 1.144 0.751 |
|  |  |  |  |
| Total HLA mismatch | 0.292 | -.0379 | 0.967 0.981 |
| Recipient age | .252 | .0137 | 0.916 1.033 |
| Donor age | .230 | -.0175 | 0.852 0 .952 |
| Cold ischemia time | -.489 | -.0001 | 0.820 1.070 |
| CRF | -.044 | .0224 | 0.786 1.092 |
| eGFR 3 months post-transplant | -.185 | -.011 | 0.527 1.546 |
|  |  |  |  |
| Extended criteria donor |  |  |  |
| yes | .105 | -.0269 | 1.163 0.965 |

Table 1: Standardized differences and variance ratio for propensity score analysis with IPW for graft survival

|  | Standardized differences | | Variance ratio |
| --- | --- | --- | --- |
|  | Raw | Weighted | Raw Weighted |
|  |  |  |  |
| Steroids protocol |  |  |  |
| yes | -0.158 | 0.106 | 1.436 0.821 |
|  |  |  |  |
| Delayed graft function |  |  |  |
| yes | -.0453 | .0138 | 0.893 1.036 |
|  |  |  |  |
| Recipient gender |  |  |  |
| Female | <0.001 | -0.008 | 0.999 0 .994 |
|  |  |  |  |
| Donor type |  |  |  |
| Living - unrelated | 0.338 | -0.007 | 2.650 0 .983 |
| DBD | -0.371 | -.007 | 1.181 1.001 |
|  |  |  |  |
| ethnicity |  |  |  |
| Asian | 0.162 | -.0739 | 1.494 0.859 |
| Black | 0.127 | -0.061 | 1.710 0.807 |
| Other | 0.023 | -.0550 | 1.141 0.756 |
|  |  |  |  |
| Total HLA mismatch | 0.288 | -.037 | 0.969 0.982 |
| Recipient age | 0.246 | 0.015 | 0.918 1.032 |
| Donor age | 0.227 | -.015 | 0.851 0 .952 |
| Cold ischemia time | -0.490 | -.001 | 0.815 1.068 |
| CRF | -.045 | 0.022 | 0.784 1.091 |
| eGFR 3 months post-transplant | -.182 | -.012 | 0.527 1.528 |
|  |  |  |  |
| Extended criteria donor |  |  |  |
| yes | 0.101 | -.0250 | 1.157 0 .967 |

Table 2: Standardized differences and variance ratio for propensity score analysis with IPW for eGFR rates at one-year post-transplant
